# Supplementary material for: Cultivation reduces quantities of mineral-organic associations in the form of amorphous coprecipitates
Source: Copernicus journal article supplement (doi:10.5194/egusphere-2024-2933), 2024-09-30
Supplement: Supplementary file [file egusphere-2024-2933-AC1-supplement.pdf]

Supplementary figures for review :

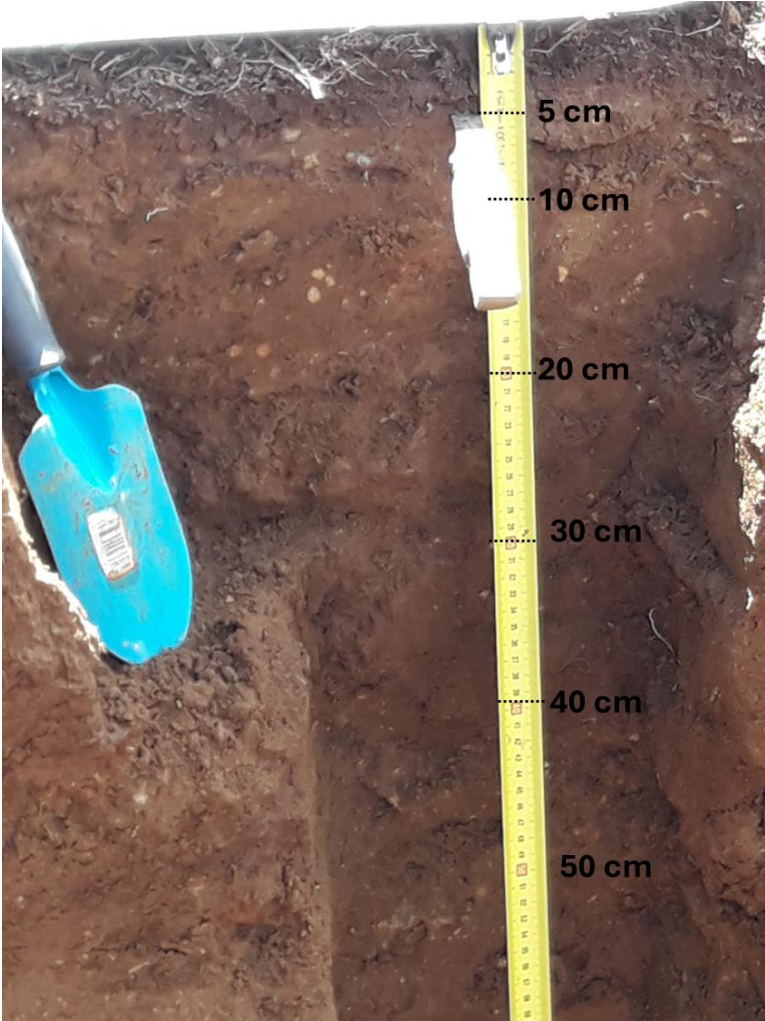

Figure 1. Picture of the forest soil profile during sampling.

## Area 1

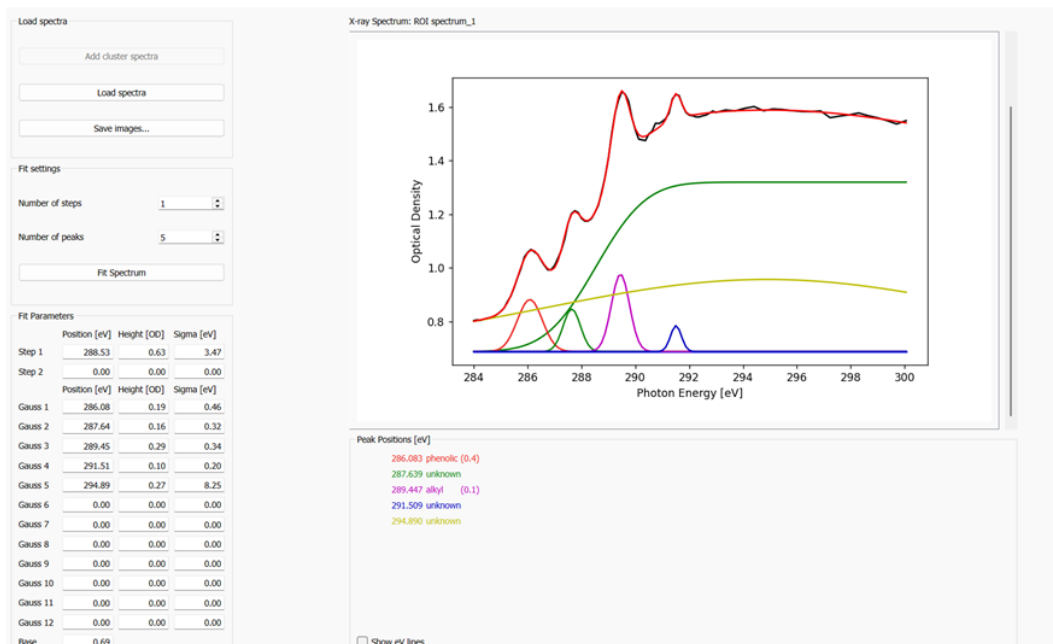

## Area 5

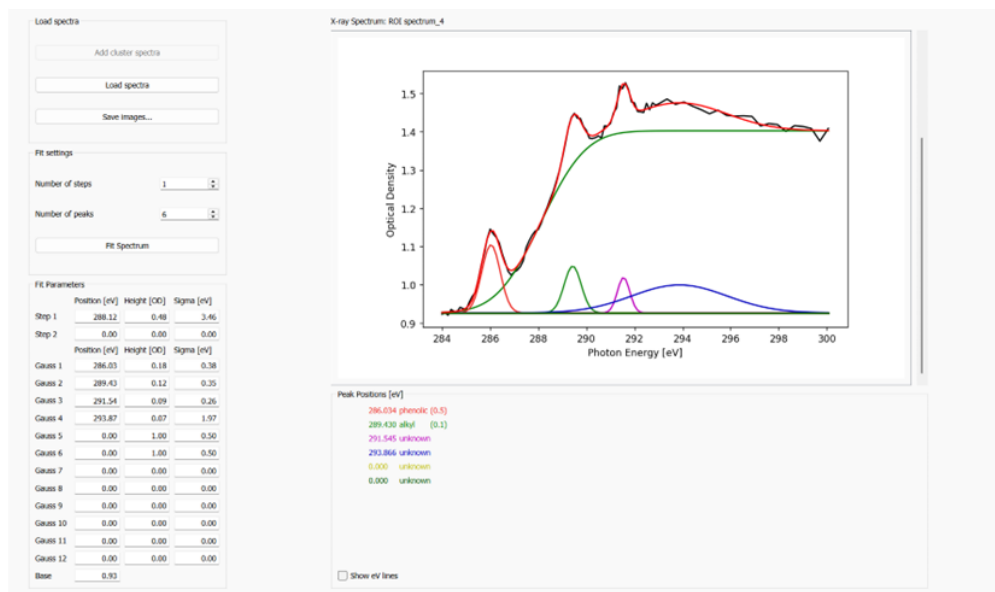

Figure 2. Deconvolution procedures applied to the C K-edge spectra of area 1 rich in C+Fe+Al and area 5 rich in C+Al. In this figure, the energy shift is not corrected, which explains why the peak at 286.6 in figure 7 is slightly shifted in energy in this figure.
